# Supplementary material for: Characterization of Emerging Pathogens Carrying bla KPC-2 Gene in IncP-6 Plasmids Isolated From Urban Sewage in Argentina
Source: Front Cell Infect Microbiol. 2021 Aug 24;11:722536. doi: 10.3389/fcimb.2021.722536 (PMC8421773; doi:10.3389/fcimb.2021.722536)
Supplement: Supplementary file 2 [file Table_1.xlsx]

## Sheet: Metadata for WW14A phylogenetic
Table S1. Metadata and accession numbers of the 313 isolates included in the phylogenetic analysis of WW14A. The phylogroups KpI, KpIIA, KpIIB and KpIII correspond to K. pneumoniae, K. quasipneumoniae subsp. quasipneumoniae, K. quasipneumoniae subsp. similipneumoniae and K. variicola, respectively.
Strain name	Phylogroup	Assembly/SRA/DDBJ accession number	Country isolated	Year isolated	Origin
TL125	KpI	ERS012055	UK	2009	Mouse faeces
01A030	KpIIA	Sputum (Col+A1:F20onization)	Austria	1997	Clinical isolate (Bacteremia )
WW14A	KpIIA	SRR14018333, SRR14018331	Argentina	2018	Environmental isolate (wastewater)
UCICRE 14	KpIIA	GCA_000492415.1	NA	NA	NA
18A069	KpIIA	GCA_000612905.1	NA	NA	NA
MGH96	KpIIA	GCA_001033665.1	NA	2014	Clinical isolate
MGH113	KpIIA	GCA_001033805.1	NA	2014	Clinical isolate
865_KPNE	KpIIA	GCA_001067585.1	USA	2014	Clinical isolate
FI_HV_2014	KpIIA	GCA_001208885.1	Italy	2014	Clinical isolate (Bacteremia )
50667959	KpIIA	GCA_001463185.1	Norway	2012	Haematoma gall bladder
21_GR_13	KpIIA	GCA_001701875.1	Greece	2013	Clinical isolate (Urine)
KP025	KpIIA	GCA_002119945.1	Colombia	2013	Clinical isolate (Urine, intra-abdominal infection)
CRK0052	KpIIA	GCA_002184905.2	USA	2014	Clinical isolate (Bacteremia )
PO1285	KpIIA	GCA_002186915.1	Nigeria	2010	Clinical isolate (Bacteremia )
AK_SD_007	KpIIA	GCA_002188215.1	Nigeria	2014	Clinical isolate (Bacteremia )
KPCTRSRTH05	KpIIA	GCA_002248945.2	Thailand	2016	Clinical isolate (Swine rectal swab)
COL-Kpn18	KpIIA	GCA_002851085.1	Colombia	2005	Clinical isolate
COL-Kpn6	KpIIA	GCA_002851295.1	Colombia	2003	Clinical isolate
COL-Kpn1B	KpIIA	GCA_002851315.1	Colombia	2005	Clinical isolate
SCKQ020041	KpIIA	GCA_002853045.1	China	2016	NA
COL-Kpn130	KpIIA	GCA_002853615.1	Colombia	2003	Clinical isolate
COL-Kpn128	KpIIA	GCA_002853635.1	Colombia	2005	Clinical isolate
COL-Kpn129	KpIIA	GCA_002853695.1	Colombia	2005	Clinical isolate
COL-Kpn120	KpIIA	GCA_002853875.1	Colombia	2002	Clinical isolate
COL-Kpn61	KpIIA	GCA_002854535.1	Colombia	2007	Clinical isolate
COL-Kpn60	KpIIA	GCA_002854595.1	Colombia	2007	Clinical isolate
COL-Kpn133	KpIIA	GCA_002854775.1	Colombia	2002	Clinical isolate
COL-Kpn81	KpIIA	GCA_002855095.1	Colombia	2011	Clinical isolate
COL-Kpn67	KpIIA	GCA_002855225.1	Colombia	2009	Clinical isolate
COL-Kpn49	KpIIA	GCA_002855355.1	Colombia	2007	Clinical isolate
D52	KpIIA	GCA_002855865.1	USA	2017	Clinical isolate (cow milk mastitis)
D65	KpIIA	GCA_002856275.1	USA	2017	Clinical isolate (cow milk mastitis)
C37	KpIIA	GCA_002856365.1	USA	2017	Clinical isolate (cow milk mastitis)
D32	KpIIA	GCA_002856485.1	USA	2017	Clinical isolate (cow milk mastitis)
D30	KpIIA	GCA_002856505.1	USA	2017	Clinical isolate (cow milk mastitis)
D16	KpIIA	GCA_002856665.1	USA	2017	Clinical isolate (cow milk mastitis)
D13	KpIIA	GCA_002857265.1	USA	2017	Clinical isolate (cow milk mastitis)
CRK0311	KpIIA	GCA_002936005.2	USA	2015	Miscellaneous body fluid
YH17268	KpIIA	GCA_002967105.1	China	2016	Chicken
YH17269	KpIIA	GCA_002967155.1	China	2016	Chicken
CAV2018	KpIIA	GCA_003146635.1	USA	2014	Environmental isolate (hospital waste water)
CAV2013	KpIIA	GCA_003146655.1	USA	2013	Rectal mucose (colonization)
CAV1947	KpIIA	GCA_003146685.1	USA	2014	Environmental isolate (hospital waste water)
WUSM_KQ_89	KpIIA	GCA_003195375.1	USA	2017	Clinical isolate
WUSM_KQ_87	KpIIA	GCA_003195585.1	USA	2017	Clinical isolate
WUSM_KQ_100	KpIIA	GCA_003196635.1	USA	2017	Clinical isolate (Bacteremia )
A708	KpIIA	GCA_003285165.1	China	2014	Clinical isolate (Bacteremia )
TUM14042	KpIIA	GCA_004311685.1	Japan	2014	Clinical isolate (Bacteremia )
TUM14048	KpIIA	GCA_004311805.1	Japan	2014	Clinical isolate (Bacteremia )
TUM14094	KpIIA	GCA_004312725.1	Japan	2013	Clinical isolate (Bacteremia )
QH220-2-2-1	KpIIA	GCA_004320805.1	China	2016	Feces migratory bird
255-1	KpIIA	GCA_004321035.1	China	2016	Feces migratory bird
QH276-1-2	KpIIA	GCA_004321255.1	China	2016	Feces migratory bird
345-3	KpIIA	GCA_004321325.1	China	2016	Feces migratory bird
13020	KpIIA	GCA_005503875.1	China	2017	Clinical isolate
10014	KpIIA	GCA_005503885.1	China	2017	Clinical isolate
34H	KpIIA	GCA_006151965.1	Brazil	2014	Clinical isolate (Bacteremia, perfusion fluid )
M17277	KpIIA	GCA_008632435.1	Argentina	2014	Rectal mucose (colonization)
A708	KpIIA	GCA_008807175.1	China	2014	Clinical isolate (Bacteremia )
SNI47	KpIIA	GCA_009002435.1	Japan	2018	Environmental isolate (waste water)
Cln185	KpIIA	GCA_009498635.1	China	2018	Clinical isolate
ST899-OXA48	KpIIA	GCA_009746175.1	Spain	2013/2014	Clinical isolate (Bacteremia )
M-T1-X3	KpIIA	GCA_011075265.1	China	2017	Swine
M-T1	KpIIA	GCA_011075295.1	China	2017	Swine
SGM81	KpIIA	GCA_900187335.1	India	2013	Environmental isolate (soil)
ID_15	KpIIA	GCA_900498345.1	Germany	2014	Clinical isolate
ID_27	KpIIA	GCA_900498395.1	Germany	2014	Clinical isolate
ID_9	KpIIA	GCA_900498455.1	Germany	2014	Clinical isolate
ID_28	KpIIA	GCA_900498465.1	Germany	2014	Clinical isolate
EuSCAPE_IL014	KpIIA	GCA_900509215.2	Israel	2013	Clinical isolate (Urine infection )
EuSCAPE_IL023	KpIIA	GCA_900509225.1	Israel	2014	Clinical isolate (Bacteremia )
EuSCAPE_IT035	KpIIA	GCA_900509255.1	Italy	2013	Clinical isolate (Wound Secretion )
EuSCAPE_IT111	KpIIA	GCA_900509265.1	Italy	2013	Clinical isolate (Urine infection )
EuSCAPE_IT157	KpIIA	GCA_900509275.1	Italy	2014	Phanrynx swab (colonization)
EuSCAPE_IT263	KpIIA	GCA_900509285.1	Italy	2013	Clinical isolate (urine infection)
EuSCAPE_DK003	KpIIA	GCA_900509295.1	Denmark	2013	Lower Respiratory Tract Secrection (Colonization)
EuSCAPE_TR036	KpIIA	GCA_900509355.1	Turkey	2013	Clinical isolate (Lower Respiratory Tract Secrection )
SB1124	KpIIA	GCA_900977675.1	NA	NA	NA
U41	KpIIA	GCA_900978005.1	Germany	1990	Environmental isolate
SB59	KpIIA	GCA_900978235.1	NA	NA	NA
SB98	KpIIA	GCA_900978495.1	NA	2016	Environmental isolate
MGYG-HGUT-02510	KpIIA	GCA_902387795.1	Australia	NA	(Human gut)
G1129	KpIIA	GCA_002187485.1	Nigeria	2013	Clinical isolate (Bacteremia )
TTHS016	KpIIA	DRS050663	Taiwan	2015	Hospital wastewater
TTHS021	KpIIA	DRS050668	Taiwan	2015	Hospital wastewater
TTWP002	KpIIA	DRS050656	Taiwan	2015	Municipal wastewater treatment plant
JSWP033	KpIIA	DRS050674	Japan	2015	Municipal wastewater treatment plant
O31P	KpIIB	GCA_009647335.1	China	2018	Clinical isolate (dog feces)
M31	KpIIB	GCA_009648015.1	China	2018	Clinical isolate (dog feces)
A10	KpIIB	GCA_009910695.1	NA	NA	Clinical isolate (Urine infection )
FDAARGOS_93 (ATCC 700603)	KpIIB	GCA_002953295.1	USA	1994	Clinical isolate (Urine infection)
KPCTRSRTH03	KpIIB	GCA_002248055.2	Thailand	2016	Clinical isolate (Swine rectal swab)
KPCTRSRTH04	KpIIB	GCA_002248085.2	Thailand	2016	Clinical isolate (Swine rectal swab)
SWT10	KpIIB	GCA_007896585.1	Brazil	2016	Environmental isolate (water)
12A476	KpIIB	GCA_900977875.1	Netherlands	1998	Clinical isolate (blood)
MGH 44	KpIIB	GCA_000492795.1	NA	NA	Clinical isolate (respiratory)
07A044	KpIIB	GCA_000613225.1	NA	NA	NA
1kgm	KpIIB	GCA_000827665.1	Malaysia	2012	Environmental isolate (soil)
MGH123	KpIIB	GCA_001033915.1	NA	2014	Clinical isolate
BIDMC95	KpIIB	GCA_001034125.1	NA	2014	Clinical isolate
193_KOXY	KpIIB	GCA_001055795.1	USA	2014	Clinical isolate
385_ECLO	KpIIB	GCA_001056525.1	USA	2014	Clinical isolate
1294_KPNE	KpIIB	GCA_001060825.1	USA	2014	Clinical isolate
HKUOPLA	KpIIB	GCA_001278905.1	Hong Kong	2013	Environmental isolate (giant panda feces)
HKUOPLC	KpIIB	GCA_001280925.1	Hong Kong	2013	Environmental isolate (giant panda feces)
II EMP3	KpIIB	GCA_001466765.1	Indonesia	2013	NA
KP-Z4175	KpIIB	GCA_001611185.1	USA	2013	Rectal mucose (colonization)
MB373	KpIIB	GCA_001663535.1	Pakistan	2013	Environmental isolate (effluent)
SKLX2736	KpIIB	GCA_001701635.1	China	2011	Tissue culture
SKLX2781	KpIIB	GCA_001701645.1	China	2012	Sputum
CCBH16302	KpIIB	GCA_001715345.1	Brazil	2014	Rectal mucose (colonization)
B8095	KpIIB	GCA_001729665.1	India	2005	Clinical isolate (Bacteremia )
UNMC_7493	KpIIB	GCA_002186485.1	Nigeria	2013	Clinical isolate (Bacteremia )
PO416	KpIIB	GCA_002186565.1	Nigeria	2009	Clinical isolate (Bacteremia )
MM_2867	KpIIB	GCA_002186965.1	Nigeria	2016	Clinical isolate (Bacteremia )
G4612	KpIIB	GCA_002187175.1	Nigeria	2016	Clinical isolate (Bacteremia )
G4582	KpIIB	GCA_002187215.1	Nigeria	2016	Clinical isolate (Bacteremia )
G4601	KpIIB	GCA_002187225.1	Nigeria	2016	Clinical isolate (Bacteremia )
CAB1577	KpIIB	GCA_002187465.1	Nigeria	2013	Clinical isolate (Bacteremia )
G747	KpIIB	GCA_002187935.3	Nigeria	2013	Clinical isolate (Bacteremia )
G4704	KpIIB	GCA_002187945.1	Nigeria	2016	Clinical isolate (Bacteremia )
G4593	KpIIB	GCA_002188025.1	Nigeria	2016	Clinical isolate (Bacteremia )
MGF 5	KpIIB	GCA_002197675.1	Malaysia	2012	Human Host
MGF 8	KpIIB	GCA_002197725.1	Malaysia	2015	Clinical isolate (Urine)
G4584	KpIIB	GCA_002239895.2	Nigeria	2016	Clinical isolate (Bacteremia )
HKUOPA4	KpIIB	GCA_002240295.1	China	2013	Feces giant panda
HKUOPJ4	KpIIB	GCA_002240315.1	China	2013	Feces giant panda
HKUOPL4	KpIIB	GCA_002240335.1	China	2013	Feces giant panda
KPCRETH06	KpIIB	GCA_002246675.1	Thailand	2016	Rectal swab
KPPSTH03	KpIIB	GCA_002248565.1	Thailand	2016	Clinical isolate (sputum )
CR34	KpIIB	GCA_002285205.1	India	2017	Respiratory catheter tip
46	KpIIB	GCA_002411665.1	Ghana	2015	Clinical isolate (Urosepsis)
AUH-KIMP304	KpIIB	GCA_002775435.1	Lebanon	2014	Clinical isolate
AUH-KIMP307	KpIIB	GCA_002775515.1	Lebanon	2014	Clinical isolate
COL-Kpn19	KpIIB	GCA_002851075.1	Colombia	2006	Clinical isolate
COL-Kpn11	KpIIB	GCA_002851235.1	Colombia	2003	Clinical isolate
COL-Kpn7	KpIIB	GCA_002851595.1	Colombia	2003	Clinical isolate
SCKQ020050	KpIIB	GCA_002853015.1	China	2016	NA
COL-Kpn127	KpIIB	GCA_002853675.1	Colombia	2002	Clinical isolate
COL-Kpn124	KpIIB	GCA_002853745.1	Colombia	2002	Clinical isolate
COL-Kpn116	KpIIB	GCA_002854795.1	Colombia	2003	Clinical isolate
COL-Kpn44	KpIIB	GCA_002855425.1	Colombia	2006	Clinical isolate
KPC142	KpIIB	GCA_003020825.1	Brazil	2011	Clinical isolate (tracheal secretion isolated from an uncertain age woman)
S009	KpIIB	GCA_003065045.1	USA	2013	Clinical isolate (Bacteremia )
CRE30	KpIIB	GCA_003400775.1	USA	2015	Clinical isolate (Bacteremia )
L22	KpIIB	GCA_003443835.1	China	2014	Bronchoalveolar lavage fluid
KP121	KpIIB	GCA_003583875.1	Brazil	2015	Rectal mucose (colonization)
KLPN_M97	KpIIB	GCA_003861065.1	USA	2017	Clinical isolate (Bacteremia )
KQ_146	KpIIB	GCA_003936335.1	Pakistan	2016	Bedside rail in hospital intensive care unit
C78	KpIIB	GCA_003954895.1	NA	NA	NA
D120-1	KpIIB	GCA_003990375.1	China	2018	Swine feces
TUM14019	KpIIB	GCA_004311225.1	Japan	2014	Clinical isolate (Bacteremia )
TUM14027	KpIIB	GCA_004311385.1	Japan	2014	Clinical isolate (Bacteremia )
TUM14029	KpIIB	GCA_004311425.1	Japan	2014	Clinical isolate (Bacteremia )
TUM14034	KpIIB	GCA_004311525.1	Japan	2014	Clinical isolate (Bacteremia )
TUM14045	KpIIB	GCA_004311745.1	Japan	2014	Clinical isolate (Bacteremia )
TUM14063	KpIIB	GCA_004312105.1	Japan	2013	Clinical isolate (Bacteremia )
TUM14092	KpIIB	GCA_004312685.1	Japan	2014	Clinical isolate (Bacteremia )
TUM14104	KpIIB	GCA_004312885.1	Japan	2014	Clinical isolate (Bacteremia )
TUM14113	KpIIB	GCA_004313065.1	Japan	2013	Clinical isolate (Bacteremia )
TUM14138	KpIIB	GCA_004313565.1	Japan	2014	Clinical isolate (Bacteremia )
QH35-1-1	KpIIB	GCA_004320585.1	China	2016	Feces migratory bird
QY2	KpIIB	GCA_004320605.1	China	2016	Fallen feather migratory bird
QH349-1-1	KpIIB	GCA_004320615.1	China	2016	Feces migratory bird
QH33-2	KpIIB	GCA_004320685.1	China	2016	Feces migratory bird
QH300-3	KpIIB	GCA_004320695.1	China	2016	Feces migratory bird
QH288-1	KpIIB	GCA_004320705.1	China	2016	Feces migratory bird
QH281-4	KpIIB	GCA_004320715.1	China	2016	Feces migratory bird
QH283-2	KpIIB	GCA_004320725.1	China	2016	Feces migratory bird
QH273-2	KpIIB	GCA_004320785.1	China	2016	Feces migratory bird
QH221-1	KpIIB	GCA_004320795.1	China	2016	Feces migratory bird
QH153-2	KpIIB	GCA_004320815.1	China	2016	Feces migratory bird
QH1207	KpIIB	GCA_004320825.1	China	2016	Feces migratory bird
393-2	KpIIB	GCA_004320885.1	China	2016	Feces migratory bird
360-1-1	KpIIB	GCA_004320895.1	China	2016	Feces migratory bird
345-1-2	KpIIB	GCA_004320905.1	China	2016	Feces migratory bird
334-2	KpIIB	GCA_004320915.1	China	2016	Feces migratory bird
332	KpIIB	GCA_004320955.1	China	2016	Feces migratory bird
311-2	KpIIB	GCA_004320985.1	China	2016	Feces migratory bird
307-1-2	KpIIB	GCA_004320995.1	China	2016	Feces migratory bird
278-1	KpIIB	GCA_004321005.1	China	2016	Feces migratory bird
273-1	KpIIB	GCA_004321025.1	China	2016	Feces migratory bird
241	KpIIB	GCA_004321065.1	China	2016	Feces migratory bird
225-2	KpIIB	GCA_004321085.1	China	2016	Feces migratory bird
239-1	KpIIB	GCA_004321095.1	China	2016	Feces migratory bird
196-1-2	KpIIB	GCA_004321125.1	China	2016	Feces migratory bird
178-2-1	KpIIB	GCA_004321165.1	China	2016	Feces migratory bird
YH16014_S2-179-1	KpIIB	GCA_004321175.1	China	2016	Feces migratory bird
QS2-1	KpIIB	GCA_004321185.1	China	2016	Soil surrounding migratory bird colonies
YH16016_S4-238-1	KpIIB	GCA_004321195.1	China	2016	Feces migratory bird
QH335-1	KpIIB	GCA_004321225.1	China	2016	Feces migratory bird
QH208	KpIIB	GCA_004321305.1	China	2016	Feces migratory bird
400-2-1	KpIIB	GCA_004321315.1	China	2016	Feces migratory bird
308-4	KpIIB	GCA_004321335.1	China	2016	Feces migratory bird
2020-01-26	KpIIB	GCA_004321405.1	China	2016	Feces migratory bird
268-1	KpIIB	GCA_004321415.1	China	2016	Feces migratory bird
Kp1345	KpIIB	GCA_006151945.1	Brazil	2017	Clinical isolate (Bacteremia )
4749	KpIIB	GCA_006546635.1	Brazil	2017	Clinical isolate
N039.E-9	KpIIB	GCA_008082425.1	USA	NA	Stool (asymptomatic)
N039.E-12	KpIIB	GCA_008082625.1	USA	NA	Stool (asymptomatic)
N039.E-11	KpIIB	GCA_008082645.1	USA	NA	Stool (asymptomatic)
N039.H-13	KpIIB	GCA_008082875.1	USA	NA	Stool (asymptomatic)
GDQ8D117M	KpIIB	GCA_008923165.1	China	2018	Duck feces
TH114	KpIIB	GCA_009387795.1	Thailand	2012	Stool (asymptomatic)
KP18-31	KpIIB	GCA_009498255.1	China	2018	Clinical isolate (Bacteremia )
OH14P	KpIIB	GCA_009647365.1	China	2018	Feces
O23P	KpIIB	GCA_009647895.1	China	2018	Clinical isolate (dog feces)
M47	KpIIB	GCA_009647915.1	China	2018	Feces
M36	KpIIB	GCA_009647945.1	China	2018	Feces
M28	KpIIB	GCA_009648035.1	China	2018	Clinical isolate (dog feces)
495	KpIIB	GCA_009733875.1	Singapore	2013/2014	Clinical isolate
Q2	KpIIB	GCA_009900705.1	China	2018	Activated sludge
87CS-G-B	KpIIB	GCA_009925365.1	Tanzania	2018	Environmental isolate (stool)
KQM_44	KpIIB	GCA_011028255.1	Lebanon	2017	NA
KP7	KpIIB	GCA_011365755.1	China	2017	Clinical isolate (stool from neonate)
KP18	KpIIB	GCA_011365785.1	China	2017	Clinical isolate (stool from neonate)
KP16	KpIIB	GCA_011365805.1	China	2017	Clinical isolate (stool from neonate)
KP21	KpIIB	GCA_011365825.1	China	2017	Clinical isolate (stool from neonate)
KP20	KpIIB	GCA_011365835.1	China	2017	Clinical isolate (stool from neonate)
KP1	KpIIB	GCA_011365865.1	China	2017	Clinical isolate (blood from neonate )
KP22	KpIIB	GCA_011365875.1	China	2017	Clinical isolate
KP15	KpIIB	GCA_011365905.1	China	2017	Clinical isolate
KP12	KpIIB	GCA_011365925.1	China	2017	Clinical isolate
KP3	KpIIB	GCA_011365945.1	China	2017	Clinical isolate
KP11	KpIIB	GCA_011365965.1	China	2017	Clinical isolate
KP2	KpIIB	GCA_011365985.1	China	2017	Clinical isolate
KP14	KpIIB	GCA_011365995.1	China	2017	Clinical isolate
KP10	KpIIB	GCA_011366025.1	China	2017	Clinical isolate
KP5	KpIIB	GCA_011366045.1	China	2017	Clinical isolate
KP13	KpIIB	GCA_011366055.1	China	2017	Clinical isolate
KP6	KpIIB	GCA_011366085.1	China	2017	Clinical isolate (stool from neonate)
KP19	KpIIB	GCA_011366095.1	China	2017	Clinical isolate (stool from neonate)
KP17	KpIIB	GCA_011366125.1	China	2017	Clinical isolate (stool from neonate)
KP4	KpIIB	GCA_011366145.1	China	2017	Clinical isolate (stool from neonate)
KP8	KpIIB	GCA_011366185.1	China	2017	Clinical isolate (stool from neonate)
BA36932	KpIIB	GCA_011759345.1	India	2019	Clinical isolate (Bacteremia )
FDAARGOS_626	KpIIB	GCA_012241635.1	USA	NA	Clinical isolate
KLP00177	KpIIB	GCA_012952465.1	USA	2017	Clinical isolate
06-219	KpIIB	GCA_900080215.1	Mexico	2006	Clinical isolate (Urine)
3189STDY5864741	KpIIB	GCA_900180495.1	Pakistan	2010/2012	Tracheal Secretions
3189STDY5864929	KpIIB	GCA_900180565.1	Pakistan	2010/2012	Clinical isolate (Bacteremia )
3189STDY5864933	KpIIB	GCA_900180585.1	Pakistan	2010/2012	Clinical isolate (Bacteremia )
3189STDY5864936	KpIIB	GCA_900180635.1	Pakistan	2010/2012	Clinical isolate (Bacteremia )
3189STDY5864941	KpIIB	GCA_900180685.1	Pakistan	2010/2012	Clinical isolate (Cerebrospinal Fluid)
3189STDY5864734	KpIIB	GCA_900180695.1	Pakistan	2010/2012	Cerebrospinal fluid
3189STDY5864930	KpIIB	GCA_900180725.1	Pakistan	2010/2012	Clinical isolate (Bacteremia )
3189STDY5864940	KpIIB	GCA_900180755.1	Pakistan	2010/2012	Clinical isolate (Bacteremia )
3189STDY5864931	KpIIB	GCA_900180805.1	Pakistan	2010/2012	Clinical isolate (Bacteremia )
3189STDY5864932	KpIIB	GCA_900180855.1	Pakistan	2010/2012	Clinical isolate (Bacteremia )
3189STDY5864935	KpIIB	GCA_900180865.1	Pakistan	2010/2012	Clinical isolate (Bacteremia )
3189STDY5864937	KpIIB	GCA_900180875.1	Pakistan	2010/2012	Clinical isolate (Bacteremia )
3189STDY5864926	KpIIB	GCA_900180895.1	Pakistan	2010/2012	Clinical isolate (Bacteremia )
3189STDY5864928	KpIIB	GCA_900180915.1	Pakistan	2010/2012	Clinical isolate (Bacteremia )
3189STDY5864756	KpIIB	GCA_900181025.1	Pakistan	2010/2012	Clinical isolate (Bacteremia )
3189STDY5864945	KpIIB	GCA_900181045.1	Pakistan	2010/2012	Clinical isolate (Cerebrospinal Fluid)
3189STDY5864944	KpIIB	GCA_900181055.1	Pakistan	2010/2012	Clinical isolate (Bacteremia )
3189STDY5864946	KpIIB	GCA_900181065.1	Pakistan	2010/2012	Clinical isolate (Bacteremia )
3189STDY5864758	KpIIB	GCA_900181105.1	Pakistan	2010/2012	Clinical isolate (Urine)
3189STDY5864947	KpIIB	GCA_900181145.1	Pakistan	2010/2012	Clinical isolate (Bacteremia )
3189STDY5864762	KpIIB	GCA_900181155.1	Pakistan	2010/2012	Clinical isolate (Bacteremia )
3189STDY5864764	KpIIB	GCA_900181185.1	Pakistan	2010/2012	Clinical isolate (Urine)
3189STDY5864767	KpIIB	GCA_900181225.1	Pakistan	2010/2012	Clinical isolate (Cerebrospinal Fluid)
3189STDY5864768	KpIIB	GCA_900181265.1	Pakistan	2010/2012	Clinical isolate (Urine)
3189STDY5864766	KpIIB	GCA_900181285.1	Pakistan	2010/2012	Clinical isolate (Urine)
3189STDY5864882	KpIIB	GCA_900181565.1	Pakistan	2010/2012	Endotracheal tube
3189STDY5864885	KpIIB	GCA_900181645.1	Pakistan	2010/2012	Clinical isolate (Urine)
3189STDY5864890	KpIIB	GCA_900181695.1	Pakistan	2010/2012	Clinical isolate (Bacteremia )
3189STDY5864887	KpIIB	GCA_900181755.1	Pakistan	2010/2012	Pleural fluid
3189STDY5864894	KpIIB	GCA_900181785.1	Pakistan	2010/2012	Clinical isolate (Bacteremia )
3189STDY5864897	KpIIB	GCA_900181795.1	Pakistan	2010/2012	Clinical isolate (Bacteremia )
3189STDY5864898	KpIIB	GCA_900181845.1	Pakistan	2010/2012	Clinical isolate (Bacteremia )
3189STDY5864896	KpIIB	GCA_900181865.1	Pakistan	2010/2012	Clinical isolate (Urine)
3189STDY5864899	KpIIB	GCA_900181885.1	Pakistan	2010/2012	Clinical isolate (Bacteremia )
3189STDY5864900	KpIIB	GCA_900181905.1	Pakistan	2010/2012	Clinical isolate (Bacteremia )
3189STDY5864903	KpIIB	GCA_900181915.1	Pakistan	2010/2012	Clinical isolate (Bacteremia )
3189STDY5864902	KpIIB	GCA_900181925.1	Pakistan	2010/2012	Clinical isolate (Bacteremia )
3189STDY5864901	KpIIB	GCA_900181935.1	Pakistan	2010/2012	Clinical isolate (Bacteremia )
3189STDY5864904	KpIIB	GCA_900181945.1	Pakistan	2010/2012	Clinical isolate (Bacteremia )
3189STDY5864905	KpIIB	GCA_900181955.1	Pakistan	2010/2012	Clinical isolate (Bacteremia )
3189STDY5864906	KpIIB	GCA_900181965.1	Pakistan	2010/2012	Clinical isolate (Bacteremia )
3189STDY5864907	KpIIB	GCA_900181975.1	Pakistan	2010/2012	Clinical isolate (Bacteremia )
3189STDY5864909	KpIIB	GCA_900181995.1	Pakistan	2010/2012	Clinical isolate (Bacteremia )
3189STDY5864911	KpIIB	GCA_900182005.1	Pakistan	2010/2012	Clinical isolate (Bacteremia )
3189STDY5864910	KpIIB	GCA_900182015.1	Pakistan	2010/2012	Clinical isolate (Bacteremia )
3189STDY5864913	KpIIB	GCA_900182035.1	Pakistan	2010/2012	Clinical isolate (Bacteremia )
3189STDY5864914	KpIIB	GCA_900182085.1	Pakistan	2010/2012	Clinical isolate (Bacteremia )
3189STDY5864916	KpIIB	GCA_900182125.1	Pakistan	2010/2012	Clinical isolate (Bacteremia )
3189STDY5864917	KpIIB	GCA_900182135.1	Pakistan	2010/2012	Clinical isolate (Bacteremia )
3189STDY5864922	KpIIB	GCA_900182145.1	Pakistan	2010/2012	Clinical isolate (Bacteremia )
3189STDY5864918	KpIIB	GCA_900182175.1	Pakistan	2010/2012	Clinical isolate (Bacteremia )
3189STDY5864921	KpIIB	GCA_900182185.1	Pakistan	2010/2012	Clinical isolate (Bacteremia )
3189STDY5864923	KpIIB	GCA_900182195.1	Pakistan	2010/2012	Clinical isolate (Bacteremia )
3189STDY5864920	KpIIB	GCA_900182205.1	Pakistan	2010/2012	Clinical isolate (Bacteremia )
3189STDY5864924	KpIIB	GCA_900182235.1	Pakistan	2010/2012	Clinical isolate (Bacteremia )
3189STDY5864908	KpIIB	GCA_900182515.1	Pakistan	2012	Clinical isolate (Bacteremia )
3189STDY6864261	KpIIB	GCA_900474485.1	Pakistan	2014	Clinical isolate
3189STDY6864255	KpIIB	GCA_900474505.1	Pakistan	2014	Clinical isolate
EuSCAPE_AT003	KpIIB	GCA_900509185.1	Austria	2014	Feces (colonization)
EuSCAPE_FR021	KpIIB	GCA_900509205.1	Francia	2014	Clinical isolate (Bacteremia )
EuSCAPE_DE044	KpIIB	GCA_900509245.1	Germany	2014	Clinical isolate (Cervix)
EuSCAPE_SC024	KpIIB	GCA_900509305.1	Scotland	2014	Sputum (Colonization)
EuSCAPE_HR031	KpIIB	GCA_900509315.1	Croatia	2014	Clinical isolate (Wound infection)
EuSCAPE_BE039	KpIIB	GCA_900509325.1	Belgium	2014	Clinical isolate (Urine infection)
EuSCAPE_DK014	KpIIB	GCA_900509335.1	Denmark	2014	Puncture Fluids (Colonization)
EuSCAPE_TR154	KpIIB	GCA_900509345.1	Turkey	2013	Clinical isolate (urine infection)
SB3297	KpIIB	GCA_900576765.1	NA	NA	NA
09A323	KpIIB	GCA_900977715.1	Greece	1997	Clinical isolate (blood)
SB4697	KpIIB	GCA_900978135.1	NA	NA	NA
QMP M1-893	KpIII	ERS011977	USA	2007	Clinical isolate (urine)
SB5857	KpIII	GCA_900978845.1	NA	NA	NA
SB33	KpIII	GCA_900978035.1	NA	NA	NA
SB6094	KpIII	GCA_900978885.1	NA	NA	NA
SB6095	KpIII	GCA_900978905.1	NA	NA	NA

## Sheet: Metadata for WW19C phylogenetic
Table S1. Metadata and accession numbers of the 47 isolates included in the phylogenetic analysis of WW19C
Strain name	Phylogroup	ST	GenBank/SRA/DDBJ accession number	Country isolated	Year isolated	Isolation source
DC4	K	507	NZ_AZUB01000000	missing	missing	yellow yam
JD6301	P	563	NZ_JDWH01000000	missing	missing	missing
BWH 43	L	414	NZ_JMUR01000000	USA	2013	urine sample
GN03164	O	550	NZ_LECZ01000000	USA	2009	bodily fluid
BIDMC92	N	497	NZ_LETR01000000	missing	2014	missing
GN02548	R	701	NZ_LEDQ01000000	USA	2007	bodily fluid
TTHS030	Q	910	DRA006131	Taiwan	2015	wastewater
DSM13645	Q	806	NZ_CP017181	Japan	missing	blood
DSM16691	B	906	NZ_CP017179	Belgium	missing	wound
DSM16687	C	108	NZ_CP017180	Germany	missing	missing
LMG27195	A	544	NZ_CP017183	China	missing	missing
DSM14563	D	816	NZ_CP017186	Germany	missing	missing
ATCC 49162	E	469	NZ_AFHR01000000	missing	missing	missing
LMG 25706	F	467	NZ_AEXB01000000	China	missing	missing
SDM	H	584	NC_018079.1	missing	missing	missing
ATCC 13047	G	466	NC_014121.1,NC_014107.1,NC_014108.1	missing	missing	missing
KCTC 2190	N/A	N/A	NC_015663.1	missing	missing	missing
EN-119T	I	558	NZ_JTLO01000000	Germany	2005	urine sample
DSM16690	M	905	CP017184	Germany	missing	missing
ATCC35953	J	807	CP011863	missing	2014	physical
113I7	M	ST1066	QMCV00000000	France	2016	rectal swab
105H6	B	ST110	QMCY00000000	France	2016	missing
148H3	M	ST1067	QMCS00000000	France	2017	rectal swab
105H3	B	ST153	QMCZ00000000	France	2016	urine sample
105_E9	A	ST136	QMDA00000000	France	2016	urine sample
99B3	L	ST1065	QMDH00000000	France	2016	rectal swab
100A9	A	ST1069	QMDD00000000	France	2016	urine sample
153C2	D	ST487	QMCQ00000000	France	2017	blood
99D9	A	ST114	QMDG00000000	France	2016	pulmonary sample
99G9	A	ST66	QMDF00000000	France	2016	urine sample
105A4	A	ST66	QMDB00000000	France	2016	urine sample
149G8	Q	ST125	QMCJ00000000	France	2017	urine sample
168A8	M	ST595	QMCP00000000	France	2018	rectal swab
149H5	Q	ST125	QMCL00000000	France	2017	urine sample
103D9	J	ST25	QMDC00000000	France	2016	rectal swab
145e9	Q	ST125	QMCN00000000	France	2017	rectal swab
105I8	C	ST108	QMCW00000000	France	2016	urine sample
105I5	D	ST153	QMCX00000000	France	2016	urine sample
149H6	Q	ST125	QMCK00000000	France	2017	urine sample
145F2	Q	ST125	QMCM00000000	France	2017	urine sample
131G4	Q	ST54	QMCU00000000	France	2017	rectal swab
99G10	A	ST136	QMDE00000000	France	2016	blood
152 E1	C	ST1067	QMCR00000000	France	2017	urine sample
MER	Q	ST125	QGLV00000000	France	2016	missing
151B8	Q	ST125	QMCI00000000	France	2017	urine sample
121J9	Q	ST125	QMCO00000000	France	2016	urine sample
WW19C	J	ST1407	SRR14018332, SRR14018330	Argentina	2018	wastewater
EN3600	J	ST25	CP035633– CP035638	China	2015	blood
